1           **SARS-CoV-2 testing of 11,884 healthcare workers at an acute**  
2           **NHS hospital trust in England: a retrospective analysis**

3  
4   **Authors:**

5   Aidan T. Hanrath<sup>1</sup>, Ina Schim van der Loeff<sup>1</sup>, Dennis W. Lendrem<sup>1,2</sup>, Kenneth F. Baker<sup>1,2</sup>, David A.  
6   Price<sup>3</sup>, Peter McDowall<sup>3</sup>, Kiera McDowall<sup>3</sup>, Sue Cook<sup>3</sup>, Peter Towns<sup>3</sup>, Ulrich Schwab<sup>3</sup>, Adam Evans<sup>3</sup>,  
7   Jill Dixon<sup>3</sup>, Jennifer Collins<sup>3</sup>, Shirelle Burton-Fanning<sup>3</sup>, David Saunders<sup>3</sup>, Jayne Harwood<sup>3</sup>, Julie  
8   Samuel<sup>3</sup>, Matthias L. Schmid<sup>3</sup>, Lucia Pareja-Cebrian<sup>3</sup>, Ewan Hunter<sup>3</sup>, Elizabeth Murphy<sup>3</sup>, Yusri  
9   Taha<sup>3</sup>, Brendan A. I. Payne<sup>1,3</sup>, Christopher J.A. Duncan<sup>1,3</sup>

10  
11   **Affiliations:**

12   <sup>1</sup>Translation and Clinical Research Institute, Newcastle University, Newcastle upon Tyne, United  
13   Kingdom.

14   <sup>2</sup>National Institute for Health Research (NIHR) Newcastle Biomedical Research Centre, Newcastle  
15   University and The Newcastle upon Tyne Hospitals NHS Foundation Trust, Newcastle upon Tyne,  
16   United Kingdom.

17   <sup>3</sup>The Newcastle upon Tyne Hospitals NHS Foundation Trust, Newcastle upon Tyne, United  
18   Kingdom.

19  
20   **Corresponding Author:** Dr Christopher Duncan, Translational and Clinical Research Institute,  
21   Newcastle University, UK, NE2 4HH. Telephone: +44 (0)191 2082796.  
22   Email: [christopher.duncan@newcastle.ac.uk](mailto:christopher.duncan@newcastle.ac.uk)

23  
24   **Word count:** 4095

25   **Figures:** 4

1 **ABSTRACT**

2 Healthcare workers (HCWs) are known to be at increased risk of infection with SARS-CoV-2,  
3 although whether these risks are equal across all roles is uncertain. Here we report a retrospective  
4 analysis of a large real-world dataset obtained from 10 March to 6 July 2020 in an NHS Foundation  
5 Trust in England with 17,126 employees. 3,338 HCWs underwent symptomatic PCR testing (14.4%  
6 positive, 2.8% of all staff) and 11,103 HCWs underwent serological testing for SARS-CoV-2 IgG  
7 (8.4% positive, 5.5% of all staff). Seropositivity was lower than other hospital settings in England but  
8 higher than community estimates. Increased test positivity rates were observed in HCWs from BAME  
9 backgrounds and residents in areas of higher social deprivation. A logistic regression model adjusting  
10 for these factors showed significant increases in the odds of testing positive in certain occupational  
11 groups, most notably domestic services staff, nurses and health-care assistants. PCR testing of  
12 symptomatic HCWs appeared to underestimate overall infection levels, probably due to asymptomatic  
13 seroconversion. Clinical outcomes were reassuring, with only a small minority of HCWs with  
14 COVID-19 requiring hospitalisation (2.3%) or ICU management (0.7%) and with no deaths. Despite a  
15 relatively low level of HCW infection compared to other UK cohorts, there were nevertheless  
16 important differences in test positivity rates between occupational groups, robust to adjustment for  
17 demographic factors such as ethnic background and social deprivation. Quantitative and qualitative  
18 studies are needed to better understand the factors contributing to this risk. Robust informatics  
19 solutions for HCW exposure data are essential to inform occupational monitoring.  
20

1 **INTRODUCTION**

2 The pandemic of SARS-CoV-2 serves to highlight the risk posed to healthcare workers (HCWs) by  
3 transmissible respiratory pathogens (1-7). As is the case for other highly pathogenic coronaviruses  
4 such as severe acute respiratory syndrome (SARS) and Middle East respiratory syndrome (MERS)  
5 coronaviruses, SARS-CoV-2 may also be transmitted in healthcare environments (8, 9). Protecting  
6 patients and HCWs from nosocomial novel coronavirus-19 disease (COVID-19) is a priority in the  
7 control of the SARS-CoV-2 pandemic (1, 10). There are multiple strands to this effort, including  
8 environmental controls, use of appropriate personal protective equipment (PPE), as well as rapid  
9 testing and the self-isolation at home of SARS-CoV-2 infected HCWs.

10  
11 Approaches to HCW testing include: (i) PCR testing of those with symptoms (4, 11, 12) or (ii)  
12 universal PCR screening (13, 14), recognising that up to 40% of infections may be asymptomatic  
13 (15). Each strategy has its limitations and the optimal approach remains to be determined. This  
14 decision must balance the risk to HCWs and patients with pragmatic concerns about resource  
15 allocation and maintaining safe levels of staffing. Antibody testing adds complementary, albeit  
16 retrospective, information about SARS-CoV-2 exposure. Together with PCR testing this provides a  
17 resource that can be analysed to inform HCW infection risk.

18  
19 Recent data suggest that HCWs from certain demographic backgrounds or occupational groups may  
20 have different risks of infection (2, 7, 16). To explore this further, we retrospectively analysed a large  
21 real-world testing dataset obtained between 10 March and 6 July 2020 in an NHS Foundation Trust  
22 in England with 17,126 employees. In this setting, 3,338 HCWs underwent symptomatic PCR testing  
23 and 11,103 HCWs underwent antibody testing. The aims of the analysis were: (i) to describe the  
24 results of SARS-CoV-2 PCR and antibody testing in this population; (ii) to explore demographic and  
25 occupational factors associated with SARS-CoV-2 test positivity, thereby informing the approach to  
26 protecting HCWs against COVID-19 in preparation for the next stages of the SARS-CoV-2 pandemic.

## 1 METHODS

### 3 Ethics

4 As a study of healthcare-associated infections, this was exempt from ethical approval under Section  
5 251 of the NHS Act 2006 and as a study of COVID-19 was also covered by Regulation 3(4) of the  
6 Health Service Control of Patient Information Regulations 2002 (March 2020). The study was  
7 registered as a clinical service evaluation with approval from the Medical Director. Data extraction  
8 and analysis was approved by the Caldicott Guardian (Reference No. 7566).

### 10 Setting

11 The Newcastle-upon-Tyne Hospitals (NUTH) National Health Service (NHS) Foundation Trust  
12 provides secondary care services to a local population of 302,820 (17) and is a tertiary referral centre  
13 for the wider North East England and North Cumbria regions. During the period of analysis 17,126  
14 staff were employed across two hospital sites, community sites as well as one offsite non-clinical hub  
15 with co-location of administrative, information technology, finance and other support services. NUTH  
16 also contains one of two principal contact High Consequence Infectious Diseases (HCID) treatment  
17 centres and was the first HCID unit in the UK to manage patients with COVID-19 (18).

### 19 Hospital infection control

20 From January 2020 there was a focus in the UK on active case identification in people with  
21 epidemiological risk of SARS-CoV-2 exposure (contact with a confirmed case or travel to an area  
22 with widespread transmission). All suspected or confirmed cases were admitted to HCID units. By  
23 March it became clear from hospital admission data that widespread community transmission was  
24 occurring. Testing was restricted to hospitalised patients with compatible symptoms. During this  
25 period nationwide 'lockdown' measures were implemented, including closure of schools, businesses,  
26 and travel restrictions for all but essential workers, including NHS workers, on 23 March 2020. Public  
27 Health England (PHE) issued regularly updated guidance on personal protective equipment (PPE) for  
28 HCWs in NHS hospitals and this guidance was followed in our organisation throughout. Briefly,  
29 'enhanced' or 'level 2' PPE (FFP3 mask, eye protection (visor), hood, surgical gown, gloves,  
30 waterproof apron) was used for contact with all suspected or confirmed patients until 8 March. This  
31 was then downgraded to 'level 1' PPE (surgical mask, risk-assessed eye protection, apron, gloves) for  
32 all patient contacts except those involving aerosol generating procedures (AGPs), which remained at  
33 level 2. From 1 April, level 1 PPE was mandated for all care episodes regardless of the patient's  
34 SARS-CoV-2 infection status, except for high-risk clinical areas (such as HDU/ICU) where level 2  
35 PPE was used throughout. From 15 June 2020, surgical facemasks were mandated for all workers in  
36 NHS hospitals regardless of patient contact. In NUTH these guidelines were followed and  
37 implemented in real time, and PPE was made available to all staff members requiring it. Training was  
38 rolled out to all staff members across the Trust with particular attention given to staff members  
39 working in environments caring for patients with suspected COVID-19.

### 41 SARS-CoV-2 testing programme

42 The NUTH staff testing programme has been described elsewhere (19). Briefly, this was jointly  
43 developed by the NUTH Occupational Health and Infection Prevention and Control teams. PCR  
44 testing of a nasopharyngeal swab was offered to HCWs who were deemed to fulfil the PHE case  
45 definition for COVID-19 from 10 March 2020, with a view to early identification of SARS-CoV-2  
46 infected HCWs and to reduce the need for HCWs to self-isolate without knowledge of their infection  
47 status. This was in line with the model recommended by NHS England on 12 April 2020. A local  
48 modification made by NUTH on 9 April was the inclusion in the case definition of loss of sense of  
49 smell (anosmia) and/or taste (ageusia), predating the same change to national guidance on 18 May  
50 2020. HCWs who developed COVID-19 symptoms were advised to immediately self-isolate, contact  
51 occupational health by email, and then undergo a nurse administered swab for PCR testing within 3  
52 days (and not greater than 5 days) of the onset of symptoms. Providing that the swab was negative  
53 and the HCW considered themselves sufficiently recovered they could return to work. Those who  
54 tested positive were advised to remain off work for at least 7 days and until their symptoms resolved  
55 (with the exception of a persistent cough or anosmia). As in other NHS settings, PCR testing was

1 undertaken on PHE platforms, initially using the PHE RdRp PCR assay, switching to commercial  
2 platforms (Altona Diagnostics from 1 April 2020, with the addition of Roche cobas 6800 from 7 April  
3 2020). In addition, from 29 May 2020, a programme of voluntary testing of SARS-CoV-2 IgG  
4 antibody was offered to all NUTH employees. SARS-CoV-2 nucleocapsid IgG testing was  
5 undertaken on the Roche platform (Roche Anti-SARS-CoV-2 serology assay).  
6

#### 7 **Data collection**

8 Data on all PCR and SARS-CoV-2 antibody (Ab) tests undertaken by the regional virology diagnostic  
9 laboratory during the period 10 Mar to 6 July 2020 were obtained from a prospectively maintained  
10 internal database. In addition, data from the NUTH Electronic Staff Record (ESR) were extracted to  
11 obtain demographic information (age, gender, ethnicity, staff role, postcode) of all HCWs employed  
12 by NUTH during the same period. Data for certain HCW groups not directly employed by NUTH  
13 were unavailable in ESR, therefore these groups were excluded. This included doctors at core and  
14 specialty trainee level who are employed by Health Education England North East, and North-East  
15 Ambulance Service staff. Data from ESR were matched to virology results data using surname and  
16 date of birth, with matching validated by first name, using a script written in Excel (Microsoft).  
17 Postcode data were used to obtain data on deprivation index from the Ministry of Housing,  
18 Communities and Local Government <http://imd-by-postcode.opendatacommunities.org/imd/2019>.  
19 Staff were assigned to twelve roles based on job title, clinical directorate and specific place of work  
20 (Appendix 1). To investigate clinical outcomes of HCWs testing positive for SARS-CoV-2, we cross-  
21 referenced testing data with a retrospective database of COVID-19 inpatients managed in NUTH (20),  
22 and also searched for additional cases beyond the censor point of this analysis using the electronic  
23 inpatient record. Data on hospitalisation, intensive care unit (ICU) admission, ventilation and outcome  
24 were collected.  
25

#### 26 **Data analysis**

27 Measures of central tendency and distribution were calculated using GraphPad Prism version 8.4.3  
28 (GraphPad Software LLC, US). For the initial analysis of demographic factors, ethnicity data were  
29 categorised as either white (including white British, white Irish, white other) or black, Asian or any  
30 other minority ethnic background (BAME). Deprivation index was categorised into quartiles with the  
31 most deprived quartile taken as the reference group. Contingency tables and Chi<sup>2</sup> ( $\chi^2$ ) tests were used  
32 to compare positivity rates between groups. Differences in positivity rates between staff roles were  
33 estimated using a multiple logistic regression model to adjust for the effects of age, ethnicity  
34 (BAME), gender, and deprivation (deciles were used for this analysis). Regression modelling was  
35 performed using the SAS JMP Pro Statistical Visualization Software (JMP, UK). A dummy variable  
36 (phase) was created to assess for any interaction between staff roles and the proportions of HCWs  
37 presenting for antibody testing with and without a prior history of presentation for PCR testing. In  
38 addition, the robustness of the staff roles effect was examined by stepping candidate covariables in  
39 and out of the logistic regression supplemented by generalized linear regression. While the Ab  
40 positivity rates were higher for those presenting with a prior history of PCR testing, there was no  
41 statistically significant interaction between Staff Roles and Phase ( $p=0.6963$ ). The interaction term  
42 was dropped, and the odds ratios and 95% confidence intervals constructed for the comparison of  
43 each of the Staff Roles relative to the minimal exposure group (Administrative and Managerial).

## 1 RESULTS

### 3 PCR testing

4 From 10 March to 6 July 2020, NUTH laboratories processed and provided SARS-CoV-2 PCR results  
5 on 44,781 combined nose/throat swabs. During this period, 3,721 PCR tests were undertaken on 3,338  
6 HCWs who had contacted the symptomatic testing programme (representing 19.5% of all NUTH  
7 employees). The median (IQR) turnaround time from samples arriving in the laboratory to a result  
8 being available was 7.8 (6.5 – 10.5) hours. In total 481/3,338 symptomatic HCWs tested positive for  
9 SARS-CoV-2 by PCR (14.4% [95% CI 13.3-15.6%] of those tested; 2.8% [2.6-3.1%] of all HCWs in  
10 the organisation).

### 12 PCR positivity rates varied over time

13 The number of HCWs presenting for testing and the rate of positive tests fluctuated during the study  
14 period, corresponding to the dynamics of SARS-CoV-2 transmission in the region (**Figure 1**). The  
15 number of tests performed per day ranged from three to 169 (**Figure 2A**). Most positive PCR tests  
16 (390/481, 80%) were returned in the four weeks between 23 March and 19 April, when around half of  
17 all PCR tests were done (1959/3721 [52.6%]). In this period the seven day average per-test positivity  
18 rate peaked at 23.9%, before decreasing and becoming more variable as the number of tests  
19 performed on symptomatic staff reduced (**Figure 2B**). Per-test positivity rates (seven-day average) in  
20 the last 4 weeks of the testing period were 0.8%, 2.6%, 0.0% and 0.0%, when there were only three  
21 positive tests in total.

### 23 COVID-19 clinical outcomes

24 To investigate clinical outcomes of HCWs symptomatically infected with SARS-CoV-2, we cross-  
25 referenced testing data with a separate database of COVID-19 inpatients managed in NUTH (20), and  
26 also searched hospital electronic patient records of PCR positive HCWs for additional cases beyond  
27 the censor date of this prior analysis. Seventeen of 481 (3.5%) HCWs testing positive were assessed  
28 in secondary care, and 10 (2.1%, 0.06% of all staff) required hospital admission. The median (IQR)  
29 [range] length of stay was 5 (3-8.5) [1-12] days. Three PCR-positive HCWs had severe disease on  
30 admission defined according to World Health Organisation (WHO) criteria (oxygen saturations <90%  
31 without supplemental oxygen and/or respiratory rate > 30 breaths/min) and three (0.6%) were  
32 managed in critical care, two with non-invasive pressure support. No patients were intubated or  
33 required extracorporeal membrane oxygenation (ECMO). All survived to hospital discharge.

### 35 Antibody testing

36 To complement the PCR analysis, data were analysed from a voluntary seroprevalence survey which  
37 was available to all HCWs irrespective of role and/or prior PCR testing and widely advertised in the  
38 organisation, from the 29 May. 11,103 of 17,126 HCWs (64.8%) came forward for antibody testing,  
39 including 2,557 HCWs who had previously undergone PCR testing (**Figure 3**). SARS-CoV-2 IgG  
40 was detected in 937/11,103 (8.4%) HCWs (5.5% of all staff). A gradient of seropositivity was  
41 observed, from 380/409 (92.9% [95% CI 90.0-95.0%]) of those testing positive by PCR, to 161/2,148  
42 (7.5% [6.5-8.7%]) of those testing negative by PCR, and 396/8,546 (4.6% [4.2-5.1%]) of those who  
43 had not had a PCR test ( $P < 0.001$ ,  $\chi^2$  test).

### 45 Demographic factors associated with seropositivity

46 There was no difference in the median (IQR) age of HCWs with detectable or undetectable SARS-  
47 CoV-2 IgG antibody (median 43 [IQR: 30-54] and 43 [32-53] years respectively, t test). 734/8,549  
48 (8.6% [95% CI 8.0-9.2]) females were seropositive compared to 150/2,037 (7.4% [6.3-8.6]) males ( $\chi^2$   
49 test  $p = 0.073$ ). Seropositivity in HCWs of white ethnicity was 774/9,500 (8.1% [95% CI 7.6-8.7])  
50 percent, compared to 95/894 (10.6% [8.8-12.8]) in those from BAME backgrounds ( $\chi^2$  test  $p =$   
51 0.011). Comparing deprivation data, seropositivity was noted in 301/2,926 (10.3% [95% CI 9.2-11.4])  
52 of HCWs from the most deprived quartile, compared to 575/7,571 (7.6% [7.0-8.2]) of the less  
53 deprived three quartiles ( $\chi^2$  test  $p < 0.001$ ).

### 55 Association of HCW role with SARS-CoV-2 infection

1 To explore associations between occupational role and the proportion of positive tests (defined as  
2 individuals with a positive test by PCR and/or antibody as a percentage of all those tested), HCWs  
3 were grouped into 12 categories based on roles recorded in ESR (as discussed in Appendix 1).  
4 Logistic regression analysis was performed adjusting for the demographic factors described above  
5 (**Table 1**). The administrative and managerial, non-patient facing group was used as the comparator  
6 for this analysis based on the fact that their role does not require close contact with patients or the  
7 hospital environment and that many of these staff work in an off-site location separate from the  
8 hospital sites.

9

#### 10 **Antibody testing and PCR testing**

11 Following adjustment for age, sex, ethnicity and deprivation decile there was strong statistical  
12 evidence of differences in positivity rates across staff roles for both antibody and PCR testing  
13 ( $p < 0.0001$ ). Most notably, the odds of having a positive antibody test were greater for domestic  
14 services staff, healthcare assistants (HCA) and nurses, in addition to estates and catering and patient-  
15 facing clerical workers (**Figure 4A**). A similar pattern was observed for PCR testing with the odds of  
16 testing positive also being greater for domestic Services staff, HCA and nurses (**Figure 4B**). Adjusted  
17 odds ratios and 95% confidence intervals for antibody and PCR positivity for each of the roles relative  
18 to administrative and managerial workers (the reference group) are shown in **Figure 4A-B**. For  
19 reference, the raw data are included in **Supplementary Table 1**.



## 1 DISCUSSION

2  
3 The data we report here span the first wave of the SARS-CoV-2 epidemic in England and represent  
4 among the largest combined molecular and serological testing datasets in a HCW population. Nearly  
5 one in five employees in this large organisation presented for PCR testing during the study period and  
6 14.4% percent of those tested (2.8% of the workforce) had symptomatic SARS-CoV-2 infection  
7 detected by PCR. Over two thirds of the total workforce (over 10,000 HCWs) underwent antibody  
8 testing. 8.4% of those tested (5.5% of the workforce) were seropositive. This compares to  
9 seroprevalence estimates of 6.0% for England and 5.0% for the North East of England around the  
10 same period (21) and is consistent with increased exposure in HCWs.

11  
12 These positivity rates are considerably lower than rates among HCWs in some areas of England, such  
13 as London (3), Birmingham (7), and in other parts of the North East (12), although are similar to other  
14 regions such as Oxford (2) and Cambridge (14). Factors determining the regional variation in HCW  
15 infection rates are unknown, although a relationship with the burden of inpatient cases is apparent (2,  
16 3, 7). It was not possible to draw direct comparisons with community PCR positivity rates, due to the  
17 absence of community testing during this period in England. However, community transmission can  
18 be inferred from hospital admission data. We note that PCR-confirmed cases among HCWs fell  
19 during the study period, in parallel with the decline in community and hospital cases. This occurred  
20 despite the fact that most HCWs continued to commute to work and mix in the hospital environment.  
21 Similar observations were made at another NHS site (14, 22). No shortages of PPE were reported in  
22 our organisation. This along with HCW training in donning and doffing PPE might have helped to  
23 reduce seroprevalence amongst our staff. These data suggest that the risk of sustained HCW-to-HCW  
24 transmission of SARS-CoV-2 can be mitigated in hospital environments (22), despite the recognised  
25 challenge of physical distancing in these and other healthcare settings (23).

26  
27 In our analysis, baseline factors associated with seroconversion included being from black, Asian and  
28 minority ethnic (BAME) backgrounds, and living in areas of greater social deprivation, consistent  
29 with published data from both HCWs (2, 7) and the general population (21). Our analysis makes the  
30 important additional contribution of showing that test positivity rates differ by occupational role,  
31 including after adjustment for contributing demographic factors. These occupational differences cut  
32 across clinical and non-clinical roles. Compared with the comparator group of administrative and  
33 management workers, nurses and midwives as well as healthcare assistants and dental hospital  
34 workers were more likely to test positive whereas doctors or allied health professionals did not,  
35 suggesting factors beyond patient contact may be involved.

36  
37 Other interesting observations also emerged from the analysis. Among non-clinical HCWs exposed to  
38 the hospital environment, domestic services and estates/catering workers were more likely to test  
39 positive, whereas laboratory workers handling potentially infectious specimens were not.  
40 Administrative staff working in the hospital environment (such as receptionists and ward clerks) had  
41 higher positivity rates than those outside it. The underlying reasons for differing rates among  
42 occupational groups are not known. An important limitation to the analysis was that details on  
43 individuals' contact with cases of COVID-19, either at home or in the workplace, was not collected  
44 routinely. This was in part due to how the HCW testing programme was developed, i.e. rapidly and  
45 under conditions of extremely high demand. In parallel there was also an unprecedented  
46 redeployment of HCWs to COVID-19 areas for clinical service provision throughout the organisation.  
47 This change in activity was not captured in the ESR. The value of collecting this information was  
48 demonstrated recently in another UK study where similar differences in seroprevalence by occupation  
49 were noted, including increased seroprevalence rates in domestic services, porters, nurses and estates  
50 and catering staff, although only increased rates among domestic services staff and porters (as a  
51 combined group) remained significant after adjustment for exposure to COVID-19 (2). Other studies  
52 in the UK have not reported rates according to individual occupational roles (3, 7, 11), although did  
53 highlight an increased risk among 'housekeeping' workers (7) - equivalent to domestic services  
54 workers in our dataset. Thus there is an emerging picture of higher seroprevalence rates among  
55 domestic services workers as well as those HCWs from BAME backgrounds (2, 7). Whilst the



1 underlying reasons for this are likely to be multifactorial and to include economic and social factors,  
2 enhanced surveillance and/or targeted infection control measures are a priority in these groups.

3  
4 So too are further studies to understand the relative contribution of risks. It is worth noting that within  
5 NUTH, domestic services staff used level 1 PPE from 8 March onwards. Our data also provide a  
6 signal of heightened risk in other occupational groups, notwithstanding the limitations described  
7 above. Analysis of the reproducibility of these observations in other datasets is justified. For  
8 example, some studies have shown nursing staff to be at increased risk of acquiring both SARS-CoV-  
9 2 (16, 24) and SARS-CoV (25), while others have not (26, 27). Duration of patient contact (16) and  
10 incorrect use of PPE (28-32) have also been cited as potential contributing factors in SARS-CoV-2  
11 acquisition in health care settings. Whilst occupational risk is often the focus (3, 6, 13, 16), studies  
12 continue to highlight the contribution of community acquisition (2, 5, 33, 34). Until the underlying  
13 reasons for differential rates of positivity between occupational groups are established it will be  
14 important to continue to monitor infection rates in future waves of SARS-CoV-2 transmission to  
15 assess whether current risk mitigation strategies are sufficient. Our findings also highlight the urgent  
16 need for robust informatics solutions to allow for routine collection of exposure data at an  
17 organisational level.

18  
19 This study has additional limitations. Data were collected retrospectively, thus are more prone to bias.  
20 Testing relied on HCWs presenting with symptoms or coming forward for antibody testing, therefore  
21 positives may have been missed in both cases, or alternatively this strategy may have selected for  
22 those at greater risk of testing positive. It was also not possible to account for a minority of HCWs  
23 who were shielding, and thus at much lower exposure risk, although this issue is likely to be shared  
24 across all occupational groups. Finally, small numbers made it necessary to pool some groups for  
25 analysis, resulting in relatively arbitrary staff categories (such as estates and catering or dental  
26 hospital workers).

27  
28 A strength of this dataset, compared to other published studies, is the opportunity it provides to  
29 compare results of PCR and subsequent antibody testing in over 2,500 individual HCWs.  
30 Seropositivity was 93% in those with prior PCR-confirmed infection. These data are informative as  
31 there are few studies of seroconversion rates in HCWs or in people with mild COVID-19 confirmed  
32 by prior PCR testing. The results suggest that most patients with mild but symptomatic COVID-19  
33 seroconvert, albeit with a notable minority (7%) who do not. Whether these individuals mount a T-  
34 cell response to SARS-CoV-2 is an open question. It is worth noting that in all cases antibody  
35 positivity was documented at a time after the positive PCR test, i.e. no PCR-confirmed re-infections  
36 occurred. Our data suggest that the ELISA assay is a broadly acceptable surrogate for SARS-CoV-2  
37 exposure in studies of non-hospitalised populations. The observation that seropositivity was higher in  
38 those with a negative PCR test than those who had not undergone prior PCR testing is interesting and  
39 has been reported elsewhere (27). This is possibly explained by false negative SARS-CoV-2 PCR  
40 testing, which can arise through a number of practical (e.g. sampling technique) and methodological  
41 issues (e.g. assay design) (35). In mitigation, HCWs tasked with taking swabs underwent extensive  
42 training, only pooled nose and throat swabs were taken, and the most sensitive laboratory platforms  
43 were used once available.

44  
45 The symptom-based testing approach we employed appears to have underestimated total HCW  
46 infections. The observation that around 4.6% of HCWs who did not present for symptomatic PCR  
47 testing were seropositive suggests that a considerable proportion of HCWs either experienced  
48 asymptomatic or pauci-symptomatic infection, or that they did not present for PCR testing despite  
49 experiencing symptoms. In support of the former hypothesis, a recent meta-analysis has indicated that  
50 between 4 and 41% of SARS-CoV-2 infections are asymptomatic (15). A large proportion of cases  
51 may be missed by a symptom-based testing approach, consistent with our observations. Recent data in  
52 HCWs have confirmed that asymptomatic SARS-CoV-2 infection does occur (2, 3, 7, 13, 14) and this  
53 is central to the argument for asymptomatic screening (1). This is a reasonable approach in low  
54 incidence settings. However important uncertainties to be balanced against asymptomatic HCW  
55 screening are the extent to which asymptomatic HCWs transmit SARS-CoV-2 (15), alongside more

1 pragmatic considerations such as how frequently to screen and how to deal with the issue of  
2 prolonged asymptomatic shedding of SARS-CoV-2 RNA, which occurs in between a quarter (2) and  
3 a half (36) of HCWs, but is not thought to necessarily represent infectious virus (13, 37). Roll out of  
4 asymptomatic testing in healthcare settings is anticipated.

5  
6 Despite an increased risk of SARS-CoV-2 infection, cumulative mortality rates appear lower in  
7 HCWs than in the general UK population (38). Our data demonstrate reassuringly low rates of both  
8 hospitalisation and need for critical care. This may be due to the relative absence of risk factors for  
9 mortality in this population such as advanced age and comorbidities (20), coupled with earlier  
10 diagnosis and access to treatment. This pattern has also been reported in China (24) and the US (39).

11  
12 In summary, the data reported here demonstrate that despite a relatively low level of infection  
13 compared to other UK HCW cohorts, there was an important differential risk of infection between  
14 occupational groups, robust to adjustment for other demographic factors such as BAME background  
15 and social deprivation. This finding adds to the growing evidence of differential risks among HCWs.  
16 In order to better understand the factors contributing to these risks, prospective quantitative and  
17 qualitative studies are a priority. In addition, robust informatics solutions to facilitate the routine  
18 collection of 'real world' clinical data on HCW exposure and testing within the NHS are critical to  
19 inform risk assessment and monitoring.

### 20 21 **Acknowledgements**

22 The authors acknowledge the enormous contribution of the great many nursing, laboratory,  
23 administrative, IT and managerial colleagues within NUTH who did the work to generate these data  
24 and to the staff of NUTH who came forward for testing. CJAD is funded by the Wellcome Trust  
25 (211153/Z/18/Z), the UKRI UK-Coronavirus Immunology Consortium, and the Barbour Foundation.  
26 AH is funded by the British Medical Association. KFB is funded by a National Institute for Health  
27 Research (NIHR) Clinical Lectureship (CL-2017-01-004). BAIP is funded by the Wellcome Trust  
28 (109975/Z/15/Z, 203105/Z/16/Z). The views expressed are those of the authors and not necessarily  
29 those of NUTH, the NHS, the NIHR or the Department of Health and Social Care.

### 30 31 32 33 **Figure Legends**

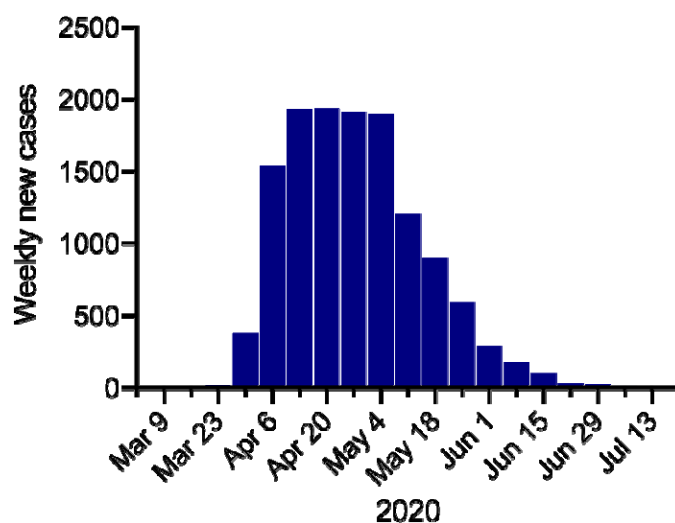

35  
36 **Figure 1.** Cases of COVID-19 in the North East England region during the study period.  
37

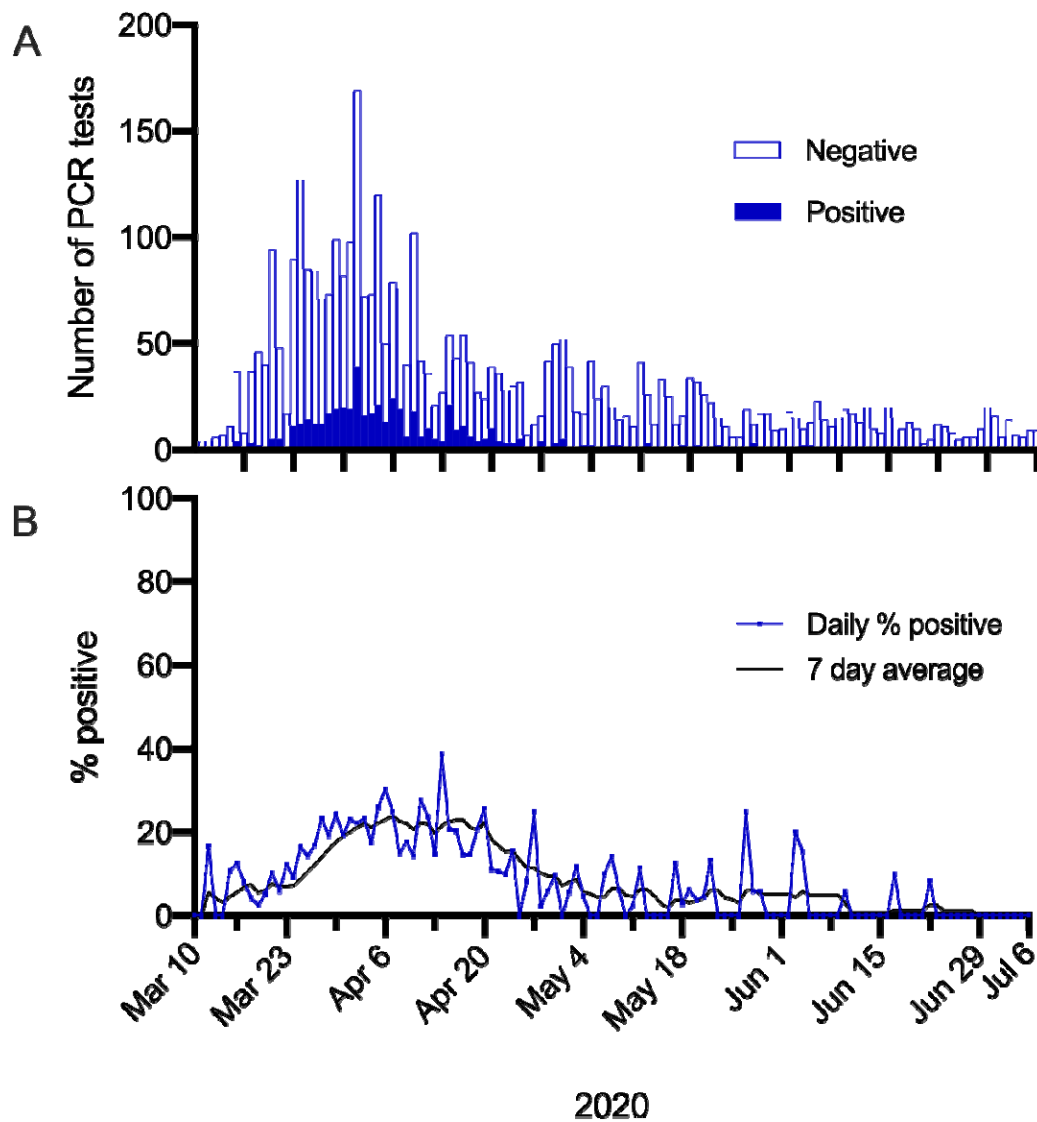

1  
2 **Figure 2. Changes in PCR test positivity over time.** (A) Total SARS-CoV-2 PCR tests in HCWs. Filled  
3 bars = positive tests. Open bars = negative tests. (B) Per test positivity (%), displayed as daily (blue  
4 line) or 7 day average (black line).  
5  
6  
7  
8

1

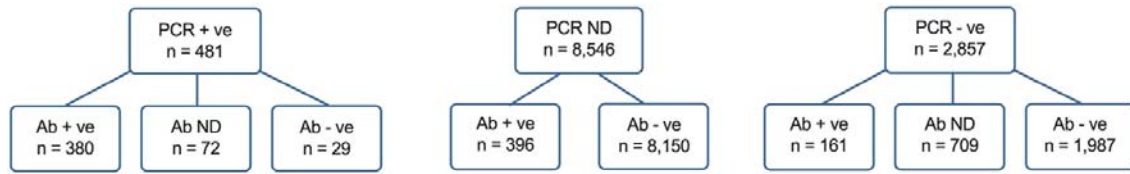

2

3

4

**Figure 3.** Schematic demonstrating SARS-CoV-2 tests done in the study population. ND = not done.

5

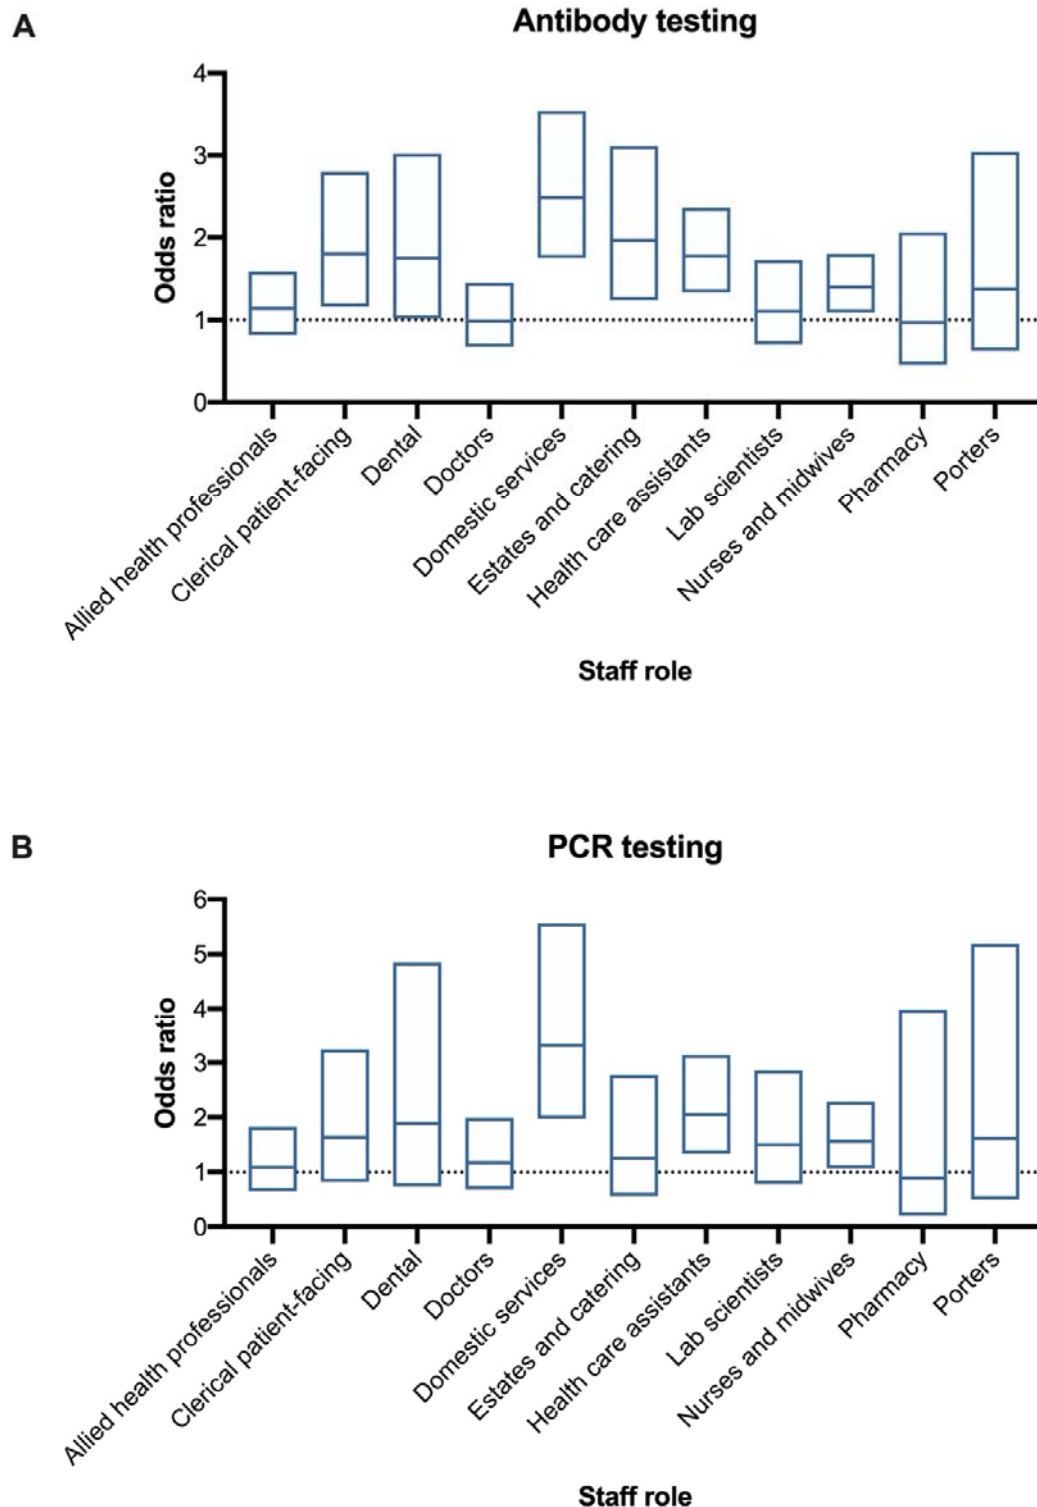

1  
2 **Figure 4. Differential test positivity among HCW groups.** (A) Adjusted odds ratio of a positive Ab  
3 test by staff category. (B) Adjusted odds ratio of a positive PCR test by staff category. Adjusted odds  
4 ratio (central line) and 95% confidence interval (box) calculated by logistic regression as described in  
5 text (compared to non-patient facing administrative and managerial workers).

1 **References**

- 2 1. Black JRM, Bailey C, Przewrocka J, Dijkstra KK, Swanton C. COVID-19: the case  
3 for health-care worker screening to prevent hospital transmission. *Lancet*.  
4 2020;395(10234):1418-20.
- 5 2. Eyre DW, Lumley SF, O'Donnell D, Campbell M, Sims E, Lawson E, et al.  
6 Differential occupational risks to healthcare workers from SARS-CoV-2 observed during a  
7 prospective observational study. *Elife*. 2020;9.
- 8 3. Houlihan CF, Vora N, Byrne T, Lewer D, Kelly G, Heaney J, et al. Pandemic peak  
9 SARS-CoV-2 infection and seroconversion rates in London frontline health-care workers.  
10 *Lancet*. 2020;396(10246):e6-e7.
- 11 4. Hunter E, Price DA, Murphy E, van der Loeff IS, Baker KF, Lendrem D, et al. First  
12 experience of COVID-19 screening of health-care workers in England. *Lancet*.  
13 2020;395(10234):e77-e8.
- 14 5. Muhi S, Irving LB, Buising KL. COVID-19 in Australian health care workers: early  
15 experience of the Royal Melbourne Hospital emphasises the importance of community  
16 acquisition. *Med J Aust*. 2020;213(1):44- e1.
- 17 6. Nguyen LH, Drew DA, Graham MS, Joshi AD, Guo CG, Ma W, et al. Risk of  
18 COVID-19 among front-line health-care workers and the general community: a prospective  
19 cohort study. *Lancet Public Health*. 2020;5(9):e475-e83.
- 20 7. Shields A, Faustini SE, Perez-Toledo M, Jossi S, Aldera E, Allen JD, et al. SARS-  
21 CoV-2 seroprevalence and asymptomatic viral carriage in healthcare workers: a cross-  
22 sectional study. *Thorax*. 2020.
- 23 8. Santarpia JL, Rivera DN, Herrera VL, Morwitzer MJ, Creager HM, Santarpia GW, et  
24 al. Aerosol and surface contamination of SARS-CoV-2 observed in quarantine and isolation  
25 care. *Sci Rep*. 2020;10(1):12732.
- 26 9. Ye G, Lin H, Chen S, Wang S, Zeng Z, Wang W, et al. Environmental contamination  
27 of SARS-CoV-2 in healthcare premises. *J Infect*. 2020;81(2):e1-e5.
- 28 10. Chirico F, Nucera G, Magnavita N. COVID-19: Protecting Healthcare Workers is a  
29 priority. *Infect Control Hosp Epidemiol*. 2020;41(9):1117.
- 30 11. Keeley AJ, Evans C, Colton H, Ankcorn M, Cope A, State A, et al. Roll-out of  
31 SARS-CoV-2 testing for healthcare workers at a large NHS Foundation Trust in the United  
32 Kingdom, March 2020. *Euro Surveill*. 2020;25(14).
- 33 12. Leeds JS, Raviprakash V, Jacques T, Scanlon N, Cundall J, Leeds CM. Risk factors  
34 for detection of SARS-CoV-2 in healthcare workers during April 2020 in a UK hospital  
35 testing programme. *EClinicalMedicine*. 2020;26:100513.
- 36 13. Brown CS, Clare K, Chand M, Andrews J, Auckland C, Beshir S, et al. Snapshot PCR  
37 surveillance for SARS-CoV-2 in hospital staff in England. *J Infect*. 2020;81(3):427-34.
- 38 14. Rivett L, Sridhar S, Sparkes D, Routledge M, Jones NK, Forrest S, et al. Screening of  
39 healthcare workers for SARS-CoV-2 highlights the role of asymptomatic carriage in COVID-  
40 19 transmission. *Elife*. 2020;9.
- 41 15. Byambasuren O, Cardona M, Bell K, Clark J, McLaws M, Glasziou P. Estimating the  
42 extent of asymptomatic COVID-19 and its potential for community transmission: systematic  
43 review and meta-analysis. 2020.
- 44 16. Barrett ES, Horton DB, Roy J, Gennaro ML, Brooks A, Tischfield J, et al. Prevalence  
45 of SARS-CoV-2 infection in previously undiagnosed health care workers at the onset of the  
46 U.S. COVID-19 epidemic. *medRxiv*. 2020.
- 47 17. Population Estimates for the UK, England and Wales, Scotland and Northern Ireland:  
48 Mid-2019, using April 2020 local authority district codes. Office for National Statistics  
49 (2020).  
50 <https://www.ons.gov.uk/peoplepopulationandcommunity/populationandmigration/population>



- 1 [estimates/datasets/populationestimatesforukenglandandwalesscotlandandnorthernireland](#)
- 2 [accessed online 17 June 2020].
- 3 18. Lillie PJ, Samson A, Li A, Adams K, Capstick R, Barlow GD, et al. Novel
- 4 coronavirus disease (Covid-19): The first two patients in the UK with person to person
- 5 transmission. *The Journal of infection*. 2020;80(5):578-606.
- 6 19. Matthewson J, Tiplady A, Gerakios F, Foley A, Murphy E. Implementation and
- 7 analysis of a telephone support service during COVID-19. *Occupational Medicine*. 2020.
- 8 20. Baker KF, Hanrath AT, Schim van der Loeff I, Tee SA, Capstick R, Marchitelli G, et
- 9 al. COVID-19 management in a UK NHS Foundation Trust with a High Consequence
- 10 Infectious Diseases centre: a detailed descriptive analysis. medRxiv.
- 11 2020:2020.05.14.20100834.
- 12 21. Ward H, Atchison CJ, Whitaker M, Ainslie KEC, Elliot J, Okell LC, et al. Antibody
- 13 prevalence for SARS-CoV-2 in England following first peak of the pandemic: REACT2
- 14 study in 100,000 adults. 2020.
- 15 22. Jones NK, Rivett L, Sparkes D, Forrest S, Sridhar S, Young J, et al. Effective control
- 16 of SARS-CoV-2 transmission between healthcare workers during a period of diminished
- 17 community prevalence of COVID-19. *Elife*. 2020;9.
- 18 23. Arora VM, Chivu M, Schram A, Meltzer D. Implementing Physical Distancing in the
- 19 Hospital: A Key Strategy to Prevent Nosocomial Transmission of COVID-19. *Journal of*
- 20 *hospital medicine*. 2020;15(5):290-1.
- 21 24. Zheng L, Wang X, Zhou C, Liu Q, Li S, Sun Q, et al. Analysis of the infection status
- 22 of the health care workers in Wuhan during the COVID-19 outbreak: A cross-sectional study.
- 23 *Clin Infect Dis*. 2020.
- 24 25. Ip M, Chan PK, Lee N, Wu A, Ng TK, Chan L, et al. Seroprevalence of antibody to
- 25 severe acute respiratory syndrome (SARS)-associated coronavirus among health care workers
- 26 in SARS and non-SARS medical wards. *Clin Infect Dis*. 2004;38(12):e116-8.
- 27 26. Schmidt SB, Gruter L, Boltzmann M, Rollnik JD. Prevalence of serum IgG antibodies
- 28 against SARS-CoV-2 among clinic staff. *PLoS One*. 2020;15(6):e0235417.
- 29 27. Stubblefield WB, Talbot HK, Feldstein L, Tenforde MW, Rasheed MAU, Mills L, et
- 30 al. Seroprevalence of SARS-CoV-2 Among Frontline Healthcare Personnel During the First
- 31 Month of Caring for COVID-19 Patients - Nashville, Tennessee. *Clin Infect Dis*. 2020.
- 32 28. Bays DJ, Nguyen MH, Cohen SH, Waldman S, Martin CS, Thompson GR, et al.
- 33 Investigation of Nosocomial SARS-CoV-2 Transmission from Two Patients to Health Care
- 34 Workers Identifies Close Contact but not Airborne Transmission Events. *Infect Control Hosp*
- 35 *Epidemiol*. 2020:1-22.
- 36 29. Guo X, Wang J, Hu D, Wu L, Gu L, Wang Y, et al. Survey of COVID-19 Disease
- 37 Among Orthopaedic Surgeons in Wuhan, People's Republic of China. *J Bone Joint Surg Am*.
- 38 2020;102(10):847-54.
- 39 30. Maltezou HC, Dedoukou X, Tseroni M, Tsonou E, Raftopoulos V, Papadima K, et al.
- 40 SARS-CoV-2 infection in healthcare personnel with high-risk occupational exposure:
- 41 evaluation of seven-day exclusion from work policy. *Clin Infect Dis*. 2020.
- 42 31. Nienhaus A, Hod R. COVID-19 among Health Workers in Germany and Malaysia.
- 43 *Int J Environ Res Public Health*. 2020;17(13).
- 44 32. Paderno A, Fior M, Berretti G, Schreiber A, Grammatica A, Mattavelli D, et al.
- 45 SARS-CoV-2 Infection in Health Care Workers: Cross-sectional Analysis of an
- 46 Otolaryngology Unit. *Otolaryngol Head Neck Surg*. 2020:194599820932162.
- 47 33. Quattrone F, Vabanesi M, Borghini A, De Vito G, Emdin M, Passino C. The value of
- 48 hospital personnel serological screening in an integrated COVID-19 infection prevention and
- 49 control strategy. *Infect Control Hosp Epidemiol*. 2020:1-2.

- 1 34. Steensels D, Oris E, Coninx L, Nuyens D, Delforge ML, Vermeersch P, et al.  
2 Hospital-Wide SARS-CoV-2 Antibody Screening in 3056 Staff in a Tertiary Center in  
3 Belgium. *JAMA*. 2020.
  - 4 35. Woloshin S, Patel N, Kesselheim AS. False Negative Tests for SARS-CoV-2  
5 Infection - Challenges and Implications. *N Engl J Med*. 2020;383(6):e38.
  - 6 36. Schwierzeck V, Correa-Martinez CL, Schneider KN, Mellmann A, Hennies MT,  
7 Hafezi W, et al. SARS-CoV-2 in the Employees of a Large University Hospital. *Dtsch*  
8 *Arztebl Int*. 2020;117(19):344-5.
  - 9 37. Wolfel R, Corman VM, Guggemos W, Seilmaier M, Zange S, Muller MA, et al.  
10 Virological assessment of hospitalized patients with COVID-2019. *Nature*.  
11 2020;581(7809):465-9.
  - 12 38. Levene LS, Coles B, Davies MJ, Hanif W, Zaccardi F, Khunti K. COVID-19  
13 cumulative mortality rates for frontline healthcare staff in England. *Br J Gen Pract*.  
14 2020;70(696):327-8.
  - 15 39. Team CC-R. Characteristics of Health Care Personnel with COVID-19 - United  
16 States, February 12-April 9, 2020. *MMWR Morb Mortal Wkly Rep*. 2020;69(15):477-81.
- 18
